# Supplementary material
Source: HighWire-hosted journal article supplement (https://www.jpn.ca/highwire/filestream/89805/field_highwire_adjunct_files/0/jpn-120160-1-at.pdf)
Supplement: jpn-120160-1-at.pdf [file jpn-120160-1-at.pdf]

**Appendix 1** to Ramasubbu R, Anderson S, Haffenden A, et al. Double-blind optimization of subcallosal cingulate deep brain stimulation for treatment-resistant depression: a pilot study. *J Psychiatry Neurosci* 2013.

DOI: 10.1503/jpn.120160

Copyright © 2013 The Author(s) or their employer(s). To receive this resource in an accessible format, please contact us at [cmajgroup@cmaj.ca](mailto:cmajgroup@cmaj.ca).

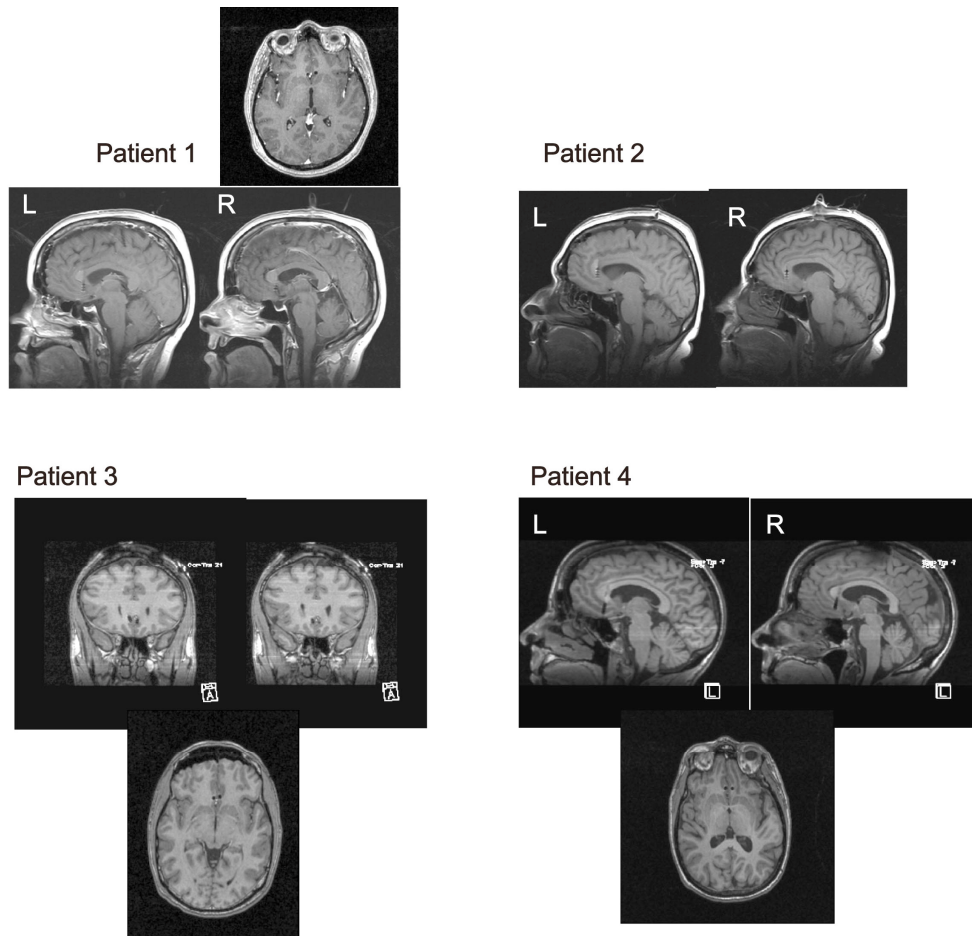

**Fig. S1:**  $T_1$ -weighted magnetic resonance image showing deep brain stimulation (DBS) placement in all patients. For patient 1, sagittal views of the left (L) and right (R) DBS lead and a representative axial image are shown. For patient 2, only sagittal images were of sufficient quality because of movement artifact. In patient 3, coronal images of the DBS lead and a representative axial image is shown. For patient 4, sagittal and a representative axial image are provided.
